# Supplementary material for: Soma–Iwamoto-type SCO complex Fe(quinazoline)2[Au(CN)2]2 using the quinazoline-type ligand
Source: Royal Society of Chemistry journal article supplement (doi:10.1039/d4dt00458b), 2024-01-01
Supplement: d4dt00458b1.pdf [file d4dt00458b1.pdf]

## Synthesis method

The complex was synthesized using Mohr's salt  $\text{Fe}(\text{NH}_4)_2(\text{SO}_4)_2 \cdot 6\text{H}_2\text{O}$ , L-ascorbic acid,  $\text{K}[\text{Au}(\text{CN})_2]$ , and quinazoline. Mohr's salt was purchased from Kanto Chemical Co., L-ascorbic acid was purchased from Nacalai Tesque Co.,  $\text{K}[\text{Au}(\text{CN})_2]$  was purchased from Toyo Chemical Industrial Co., and quinazoline was purchased from TCI, all commercially sourced.

In the powder sample synthesis, 0.4 mmol Mohr's salt (0.1569 g), 0.4 mmol L-ascorbic acid (0.0705 g), and the excess quinazoline (0.1180 g, 0.9 mmol) were dissolved in 8 mL water, and a yellow solution (Solution 1) was formed. Second, 0.8 mmol  $\text{K}[\text{Au}(\text{CN})_2]$  (0.2305 g) was dissolved in 10 mL water (Solution 2). Last, Solution 2 was dropped into the solution, and a yellow powder was obtained.

In the synthesis of a single crystal by a slow diffusion method, first, 0.1 mmol  $\text{K}[\text{Au}(\text{CN})_2]$  (0.0288 g) was dissolved in 0.2 mL water (Solution 3). Second, 0.3 mL water and 0.6 mL ethanol were mixed (Solution 4). Third, 0.05 mmol Mohr's salt (0.0196 g) and 0.05 mmol L-ascorbic acid (0.0088 g) were dissolved in 0.5 mL water. Then, 0.1 mmol quinazoline (0.0140 g) and 0.5 mL ethanol were added to this solution (Solution 5). Last, we gently added Solutions 3, 4, and 5 to a tube with a 7 mm diameter, in that order. Ethanol was added to Solutions 4 and 5 to adjust the density. Consequently, Solutions 3, 4, and 5 do not mix immediately, and a yellow crystal was obtained.

In the synthesis of a single crystal by the filter method, first, 0.05 mmol Mohr's salt (0.0196 g), 0.05 mmol L-ascorbic acid (0.0078 g), and 0.1 mmol  $\text{K}[\text{Au}(\text{CN})_2]$  (0.0288 g) were dissolved in 10 mL water (Solution 6). Second, 0.14 mmol quinazoline (0.0186 g) was placed in an 8 × 50 mm microtube. Ethanol was added until the microtube was full. The microtube was sealed using a Merck Co. Omnipore™ 0.2 μm membrane filter. Last, the microtube was placed in a sample bottle with Solution 6. Very small amount of yellow crystal was obtained.

## TG analysis

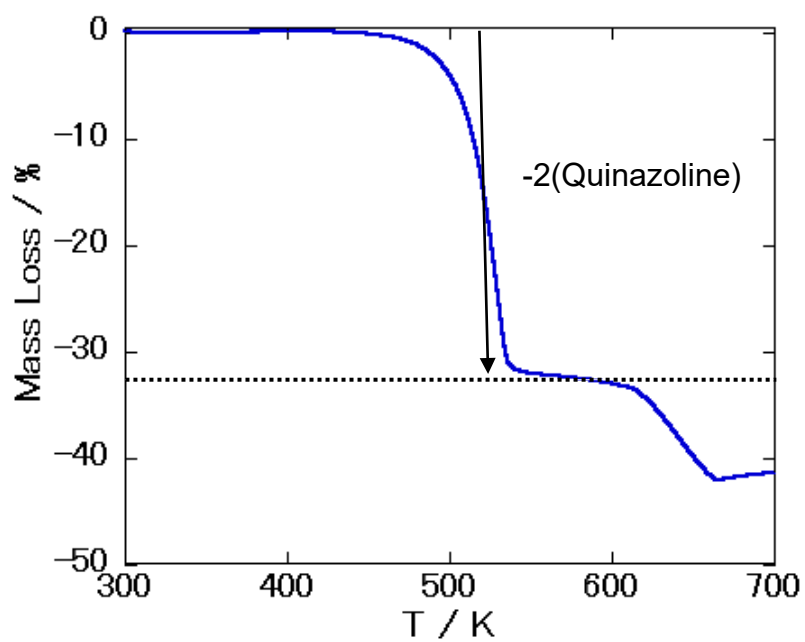

Fig. S1 TG analysis of complex 1

## IR spectra (Nujol method)

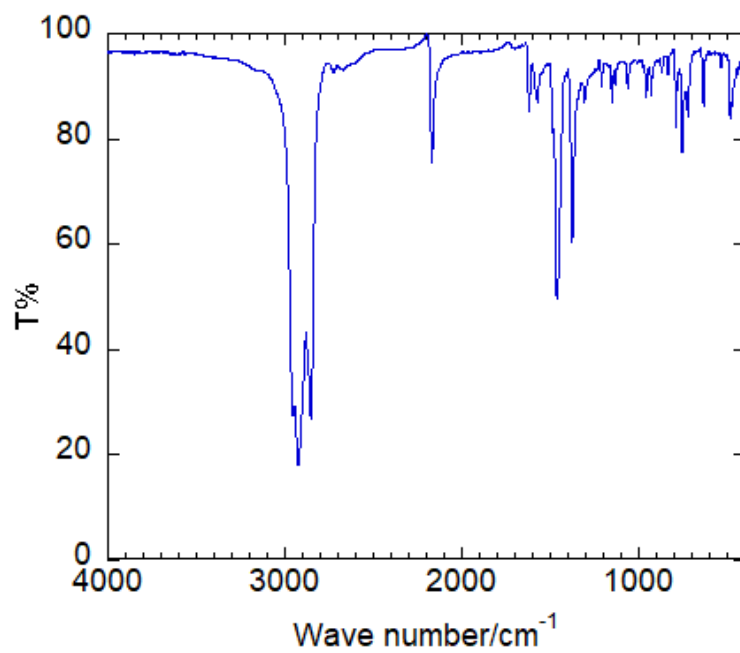

Fig. S2 IR spectrum of complex 1

C≡N peak: 2169.53 cm<sup>-1</sup>

## Powder X-ray Pattern

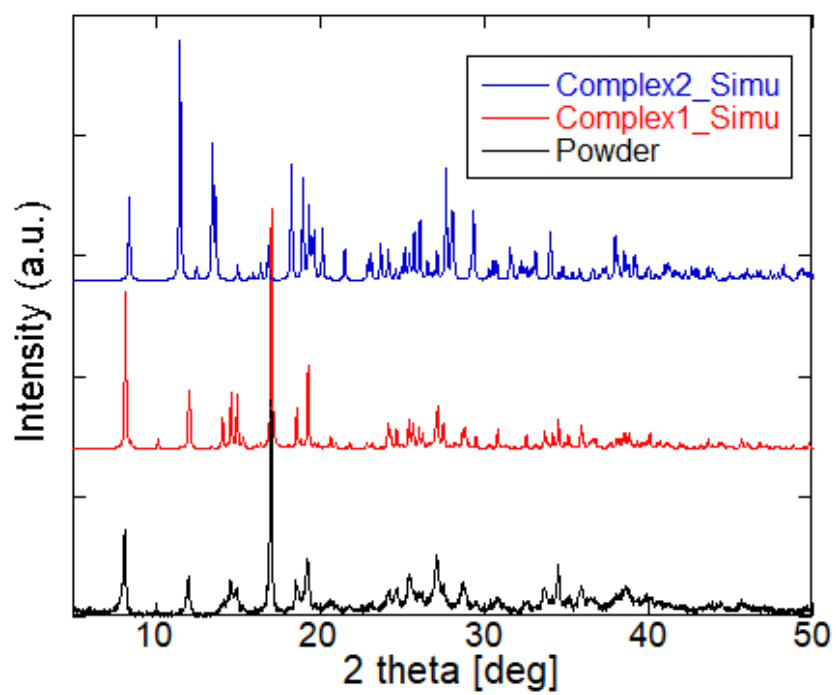

Fig. S3 Powder X-ray diffraction of synthesized complexes

## Additional crystallographic data

Table S1. Crystal data and structure refinement for complex **1** at 296 K

|                                   |                                                                   |                 |
|-----------------------------------|-------------------------------------------------------------------|-----------------|
| Identification code               | test_1_a                                                          |                 |
| Empirical formula                 | C <sub>20</sub> H <sub>12</sub> Au <sub>2</sub> Fe N <sub>8</sub> |                 |
| Formula weight                    | 814.16                                                            |                 |
| Temperature                       | 296(2) K                                                          |                 |
| Wavelength                        | 0.71073 Å                                                         |                 |
| Crystal system                    | Monoclinic                                                        |                 |
| Space group                       | P2 <sub>1</sub> /c                                                |                 |
| Unit cell dimensions              | a = 10.8433(10) Å                                                 | α = 90°.        |
|                                   | b = 14.6937(14) Å                                                 | β = 93.865(2)°. |
|                                   | c = 14.7279(14) Å                                                 | γ = 90°.        |
| Volume                            | 2341.2(4) Å <sup>3</sup>                                          |                 |
| Z                                 | 4                                                                 |                 |
| Density (calculated)              | 2.310 Mg/m <sup>3</sup>                                           |                 |
| Absorption coefficient            | 13.136 mm <sup>-1</sup>                                           |                 |
| F(000)                            | 1488                                                              |                 |
| Crystal size                      | 0.244 x 0.231 x 0.102 mm <sup>3</sup>                             |                 |
| Theta range for data collection   | 1.882 to 27.508°.                                                 |                 |
| Index ranges                      | -14 ≤ h ≤ 10, -18 ≤ k ≤ 19, -19 ≤ l ≤ 15                          |                 |
| Reflections collected             | 14851                                                             |                 |
| Independent reflections           | 5351 [R(int) = 0.0457]                                            |                 |
| Completeness to theta = 25.242°   | 100.0 %                                                           |                 |
| Absorption correction             | Numerical Mu From Formula                                         |                 |
| Max. and min. transmission        | 0.35 and 0.08                                                     |                 |
| Refinement method                 | Full-matrix least-squares on F <sup>2</sup>                       |                 |
| Data / restraints / parameters    | 5351 / 66 / 258                                                   |                 |
| Goodness-of-fit on F <sup>2</sup> | 0.951                                                             |                 |
| Final R indices [I > 2σ(I)]       | R1 = 0.0438, wR2 = 0.1373                                         |                 |
| R indices (all data)              | R1 = 0.0991, wR2 = 0.1756                                         |                 |
| Extinction coefficient            | n/a                                                               |                 |
| Largest diff. peak and hole       | 0.977 and -1.149 e.Å <sup>-3</sup>                                |                 |

Table S2. Crystal data and structure refinement for complex 1 at 150 K

|                                   |                                                                   |                 |
|-----------------------------------|-------------------------------------------------------------------|-----------------|
| Identification code               | test_1_a                                                          |                 |
| Empirical formula                 | C <sub>20</sub> H <sub>12</sub> Au <sub>2</sub> Fe N <sub>8</sub> |                 |
| Formula weight                    | 814.16                                                            |                 |
| Temperature                       | 150(2) K                                                          |                 |
| Wavelength                        | 0.71073 Å                                                         |                 |
| Crystal system                    | Monoclinic                                                        |                 |
| Space group                       | P2 <sub>1</sub> /c                                                |                 |
| Unit cell dimensions              | a = 10.698(3) Å                                                   | α = 90°.        |
|                                   | b = 14.331(4) Å                                                   | β = 94.049(4)°. |
|                                   | c = 14.527(4) Å                                                   | γ = 90°.        |
| Volume                            | 2221.7(10) Å <sup>3</sup>                                         |                 |
| Z                                 | 4                                                                 |                 |
| Density (calculated)              | 2.434 Mg/m <sup>3</sup>                                           |                 |
| Absorption coefficient            | 13.843 mm <sup>-1</sup>                                           |                 |
| F(000)                            | 1488                                                              |                 |
| Crystal size                      | 0.244 x 0.231 x 0.102 mm <sup>3</sup>                             |                 |
| Theta range for data collection   | 1.908 to 27.220°.                                                 |                 |
| Index ranges                      | -13 ≤ h ≤ 11, -18 ≤ k ≤ 18, -18 ≤ l ≤ 14                          |                 |
| Reflections collected             | 12160                                                             |                 |
| Independent reflections           | 4907 [R(int) = 0.0808]                                            |                 |
| Completeness to theta = 25.242°   | 100.0 %                                                           |                 |
| Absorption correction             | Numerical Mu From Formula                                         |                 |
| Max. and min. transmission        | 0.33 and 0.08                                                     |                 |
| Refinement method                 | Full-matrix least-squares on F <sup>2</sup>                       |                 |
| Data / restraints / parameters    | 4907 / 66 / 258                                                   |                 |
| Goodness-of-fit on F <sup>2</sup> | 0.946                                                             |                 |
| Final R indices [I > 2σ(I)]       | R1 = 0.0542, wR2 = 0.1410                                         |                 |
| R indices (all data)              | R1 = 0.1534, wR2 = 0.1944                                         |                 |
| Extinction coefficient            | n/a                                                               |                 |
| Largest diff. peak and hole       | 1.148 and -1.476 e.Å <sup>-3</sup>                                |                 |

Table S3. Crystal data and structure refinement for complex 1 at 90 K

|                                   |                                                                   |                 |
|-----------------------------------|-------------------------------------------------------------------|-----------------|
| Identification code               | test_1_a                                                          |                 |
| Empirical formula                 | C <sub>20</sub> H <sub>12</sub> Au <sub>2</sub> Fe N <sub>8</sub> |                 |
| Formula weight                    | 814.16                                                            |                 |
| Temperature                       | 90(2) K                                                           |                 |
| Wavelength                        | 0.71073 Å                                                         |                 |
| Crystal system                    | Monoclinic                                                        |                 |
| Space group                       | P2 <sub>1</sub> /c                                                |                 |
| Unit cell dimensions              | a = 10.662(3) Å                                                   | α = 90°.        |
|                                   | b = 14.119(3) Å                                                   | β = 94.257(4)°. |
|                                   | c = 14.375(4) Å                                                   | γ = 90°.        |
| Volume                            | 2158.0(9) Å <sup>3</sup>                                          |                 |
| Z                                 | 4                                                                 |                 |
| Density (calculated)              | 2.506 Mg/m <sup>3</sup>                                           |                 |
| Absorption coefficient            | 14.251 mm <sup>-1</sup>                                           |                 |
| F(000)                            | 1488                                                              |                 |
| Crystal size                      | 0.244 x 0.231 x 0.102 mm <sup>3</sup>                             |                 |
| Theta range for data collection   | 1.915 to 27.487°.                                                 |                 |
| Index ranges                      | -13 ≤ h ≤ 10, -17 ≤ k ≤ 18, -18 ≤ l ≤ 15                          |                 |
| Reflections collected             | 12065                                                             |                 |
| Independent reflections           | 4932 [R(int) = 0.0708]                                            |                 |
| Completeness to theta = 25.242°   | 100.0 %                                                           |                 |
| Absorption correction             | Numerical Mu From Formula                                         |                 |
| Max. and min. transmission        | 0.32 and 0.07                                                     |                 |
| Refinement method                 | Full-matrix least-squares on F <sup>2</sup>                       |                 |
| Data / restraints / parameters    | 4932 / 66 / 258                                                   |                 |
| Goodness-of-fit on F <sup>2</sup> | 0.933                                                             |                 |
| Final R indices [I > 2σ(I)]       | R1 = 0.0489, wR2 = 0.1305                                         |                 |
| R indices (all data)              | R1 = 0.1282, wR2 = 0.1799                                         |                 |
| Extinction coefficient            | n/a                                                               |                 |
| Largest diff. peak and hole       | 1.282 and -1.903 e.Å <sup>-3</sup>                                |                 |

Table S4. Crystal data and structure refinement for complex **2** at 296 K

|                                   |                                                                                  |                   |
|-----------------------------------|----------------------------------------------------------------------------------|-------------------|
| Identification code               | test_1                                                                           |                   |
| Empirical formula                 | C <sub>20</sub> H <sub>16</sub> Au <sub>2</sub> Fe N <sub>8</sub> O <sub>2</sub> |                   |
| Formula weight                    | 850.19                                                                           |                   |
| Temperature                       | 296(2) K                                                                         |                   |
| Wavelength                        | 0.71073 Å                                                                        |                   |
| Crystal system                    | Triclinic                                                                        |                   |
| Space group                       | P-1                                                                              |                   |
| Unit cell dimensions              | a = 7.3203(8) Å                                                                  | α = 81.6096(19)°. |
|                                   | b = 7.8613(8) Å                                                                  | β = 77.6448(18)°. |
|                                   | c = 10.8262(12) Å                                                                | γ = 79.8104(18)°. |
| Volume                            | 595.19(11) Å <sup>3</sup>                                                        |                   |
| Z                                 | 1                                                                                |                   |
| Density (calculated)              | 2.372 Mg/m <sup>3</sup>                                                          |                   |
| Absorption coefficient            | 12.929 mm <sup>-1</sup>                                                          |                   |
| F(000)                            | 392                                                                              |                   |
| Crystal size                      | 0.220 x 0.180 x 0.090 mm <sup>3</sup>                                            |                   |
| Theta range for data collection   | 1.938 to 31.236°.                                                                |                   |
| Index ranges                      | -10 ≤ h ≤ 10, -10 ≤ k ≤ 11, 0 ≤ l ≤ 15                                           |                   |
| Reflections collected             | 3361                                                                             |                   |
| Independent reflections           | 3361 [R(int) = ?]                                                                |                   |
| Completeness to theta = 25.000°   | 99.3 %                                                                           |                   |
| Absorption correction             | Semi-empirical from equivalents                                                  |                   |
| Max. and min. transmission        | 0.39 and 0.19                                                                    |                   |
| Refinement method                 | Full-matrix least-squares on F <sup>2</sup>                                      |                   |
| Data / restraints / parameters    | 3361 / 2 / 158                                                                   |                   |
| Goodness-of-fit on F <sup>2</sup> | 0.985                                                                            |                   |
| Final R indices [I > 2σ(I)]       | R1 = 0.0380, wR2 = 0.0946                                                        |                   |
| R indices (all data)              | R1 = 0.0470, wR2 = 0.0994                                                        |                   |
| Extinction coefficient            | n/a                                                                              |                   |
| Largest diff. peak and hole       | 1.943 and -2.085 e.Å <sup>-3</sup>                                               |                   |

Table S5. Crystal data and structure refinement for complex **2** at 90 K

|                                   |                                                                                  |                 |
|-----------------------------------|----------------------------------------------------------------------------------|-----------------|
| Identification code               | test_1_a                                                                         |                 |
| Empirical formula                 | C <sub>20</sub> H <sub>16</sub> Au <sub>2</sub> Fe N <sub>8</sub> O <sub>2</sub> |                 |
| Formula weight                    | 850.19                                                                           |                 |
| Temperature                       | 90(2) K                                                                          |                 |
| Wavelength                        | 0.71073 Å                                                                        |                 |
| Crystal system                    | Triclinic                                                                        |                 |
| Space group                       | P-1                                                                              |                 |
| Unit cell dimensions              | a = 7.2983(11) Å                                                                 | α = 80.236(4)°. |
|                                   | b = 7.7651(12) Å                                                                 | β = 76.919(3)°. |
|                                   | c = 10.7931(17) Å                                                                | γ = 79.867(3)°. |
| Volume                            | 581.11(16) Å <sup>3</sup>                                                        |                 |
| Z                                 | 1                                                                                |                 |
| Density (calculated)              | 2.429 Mg/m <sup>3</sup>                                                          |                 |
| Absorption coefficient            | 13.242 mm <sup>-1</sup>                                                          |                 |
| F(000)                            | 392                                                                              |                 |
| Crystal size                      | 0.280 x 0.140 x 0.110 mm <sup>3</sup>                                            |                 |
| Theta range for data collection   | 1.955 to 27.570°.                                                                |                 |
| Index ranges                      | -9 ≤ h ≤ 9, -9 ≤ k ≤ 10, 0 ≤ l ≤ 14                                              |                 |
| Reflections collected             | 2616                                                                             |                 |
| Independent reflections           | 2616 [R(int) = ?]                                                                |                 |
| Completeness to theta = 25.000°   | 99.3 %                                                                           |                 |
| Absorption correction             | Semi-empirical from equivalent                                                   |                 |
| Max. and min. transmission        | 0.32 and 0.21                                                                    |                 |
| Refinement method                 | Full-matrix least-squares on F <sup>2</sup>                                      |                 |
| Data / restraints / parameters    | 2616 / 2 / 158                                                                   |                 |
| Goodness-of-fit on F <sup>2</sup> | 0.809                                                                            |                 |
| Final R indices [I > 2σ(I)]       | R1 = 0.0315, wR2 = 0.0875                                                        |                 |
| R indices (all data)              | R1 = 0.0329, wR2 = 0.0894                                                        |                 |
| Extinction coefficient            | n/a                                                                              |                 |
| Largest diff. peak and hole       | 2.216 and -2.607 e.Å <sup>-3</sup>                                               |                 |
